# Supplementary material
Source: PubMed Central journal article supplement (PMC3585475)
Supplement: ja803230a_si_001.pdf [file ja803230a_si_001.pdf]

# Evidence for Nonstatistical Dynamics in the Wolff

## Rearrangement of a Carbene

*Aviva E. Litovitz, Ivan Keresztes, Barry K. Carpenter\*<sup>‡</sup>*

Department of Chemistry and Chemical Biology,  
Baker Laboratory, Cornell University, Ithaca, New York 14853-1301

### Supporting Information

#### Table of contents:

|                                                                 |           |
|-----------------------------------------------------------------|-----------|
| <sup>1</sup> H and <sup>13</sup> C NMR spectra of key compounds | S2 – S12  |
| Cartesian coordinates and energies of stationary points         | S12 – S21 |
| Complete literature citations for references 10 and 11b         | S21       |

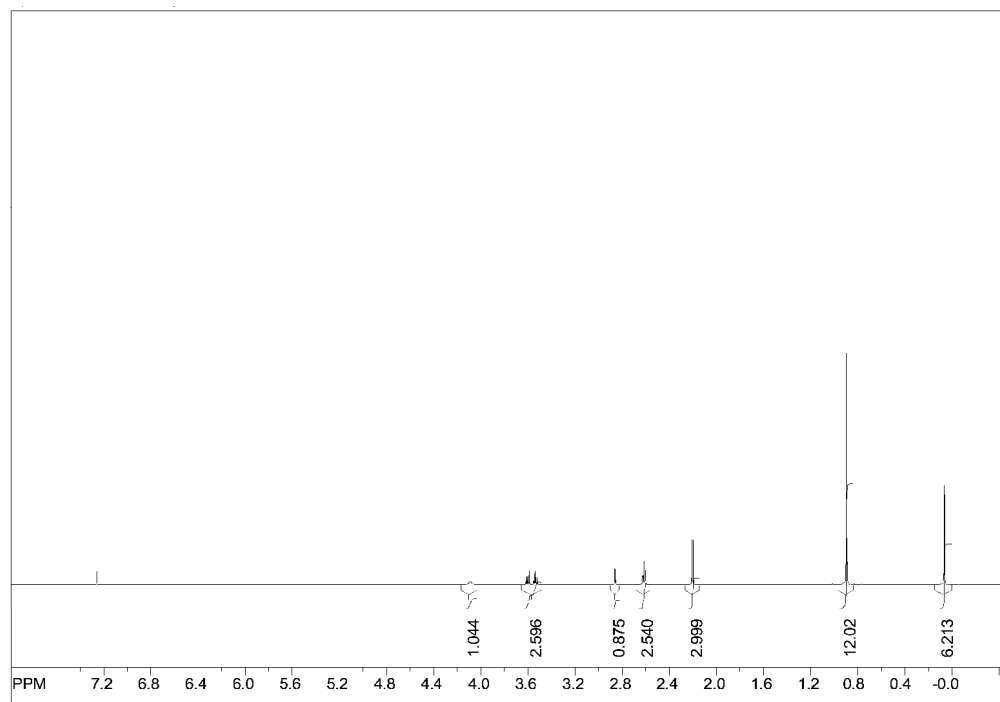

**Figure S1:** <sup>1</sup>H NMR spectrum of 5-(*tert*-butyltrimethylsilyloxy)-4-hydroxypentan-2-one-2-<sup>13</sup>C (14)

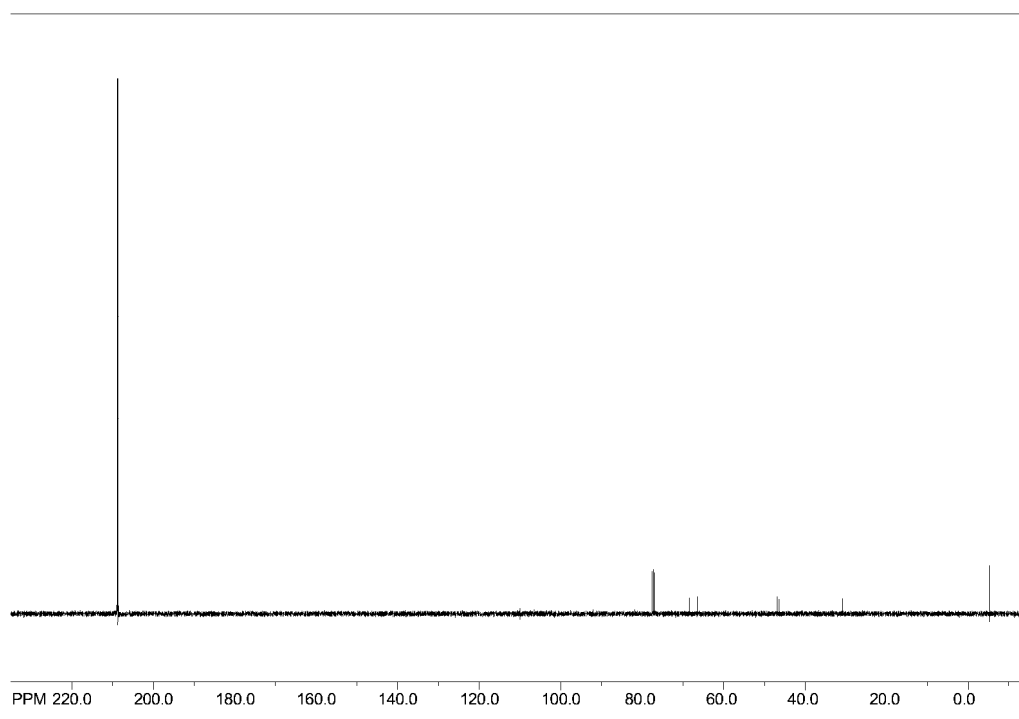

**Figure S2:** <sup>13</sup>C NMR spectrum of 5-(*tert*-butyltrimethylsilyloxy)-4-hydroxypentan-2-one-2-<sup>13</sup>C (14)

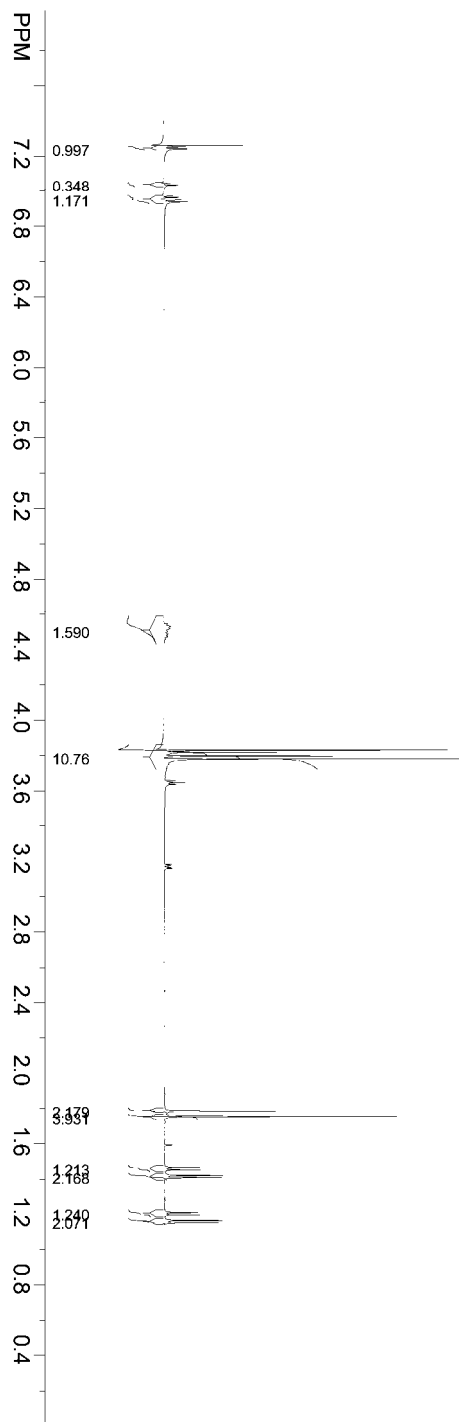

**Figure S3:** <sup>1</sup>H NMR spectrum of dimethyl 1-(1-hydroxyethyl-2-<sup>13</sup>C)-4-methyl-7-oxabicyclo-[2.2.1]hepta-2,5-diene-2,3-dicarboxylate (**7a**)

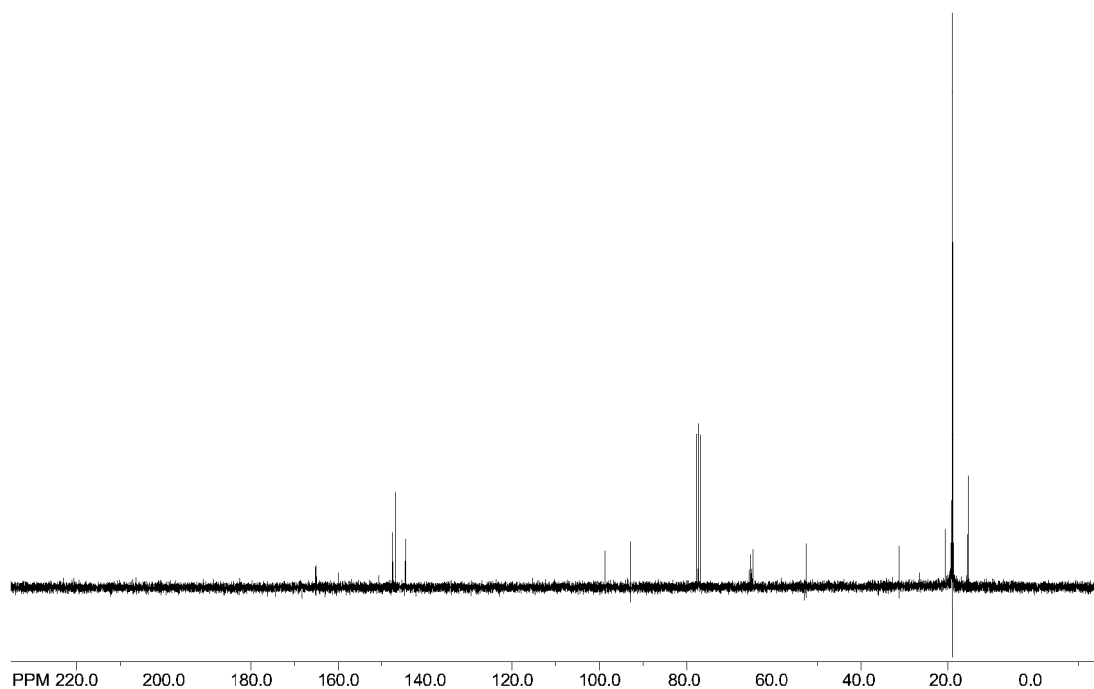

**Figure S4:**  $^{13}\text{C}$  NMR spectrum of dimethyl 1-(1-hydroxyethyl-2- $^{13}\text{C}$ )-4-methyl-7-oxabicyclo-[2.2.1]hepta-2,5-diene-2,3-dicarboxylate (**7a**)

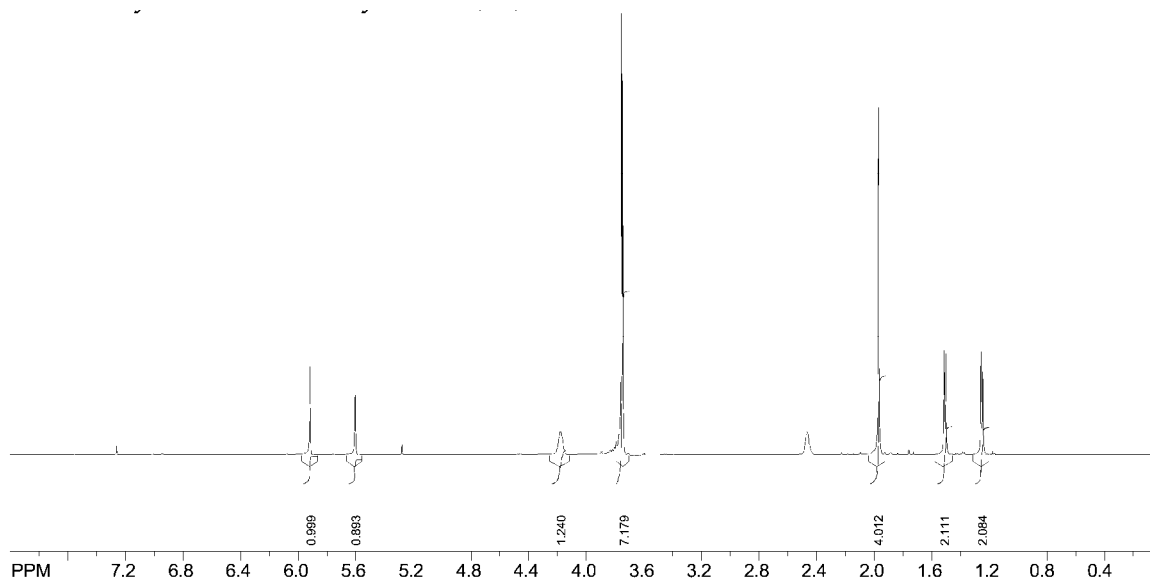

**Figure S5:**  $^1\text{H}$  NMR spectrum of dimethyl 1-(1-hydroxyethyl-2- $^{13}\text{C}$ )-7-methyloxepin-4,5-dicarboxylate (**9a**)

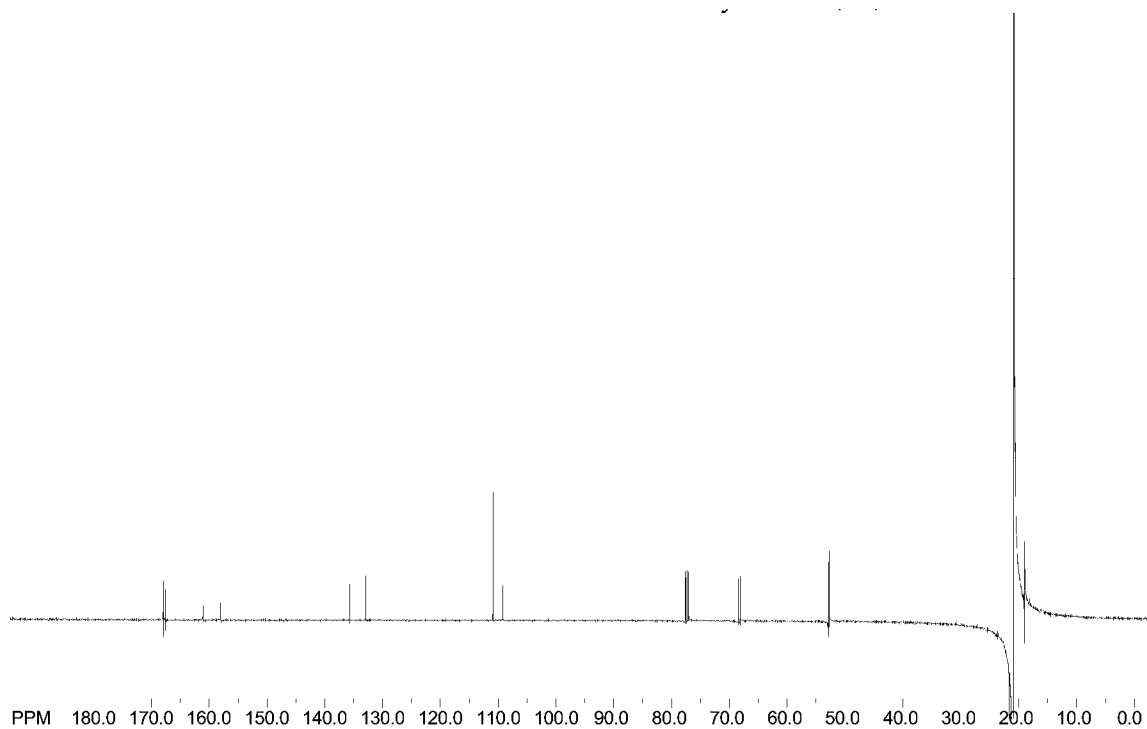

**Figure S6:**  $^{13}\text{C}$  NMR spectrum of dimethyl 1-(1-hydroxyethyl-2- $^{13}\text{C}$ )-7-methyloxepin-4,5-dicarboxylate (**9a**)

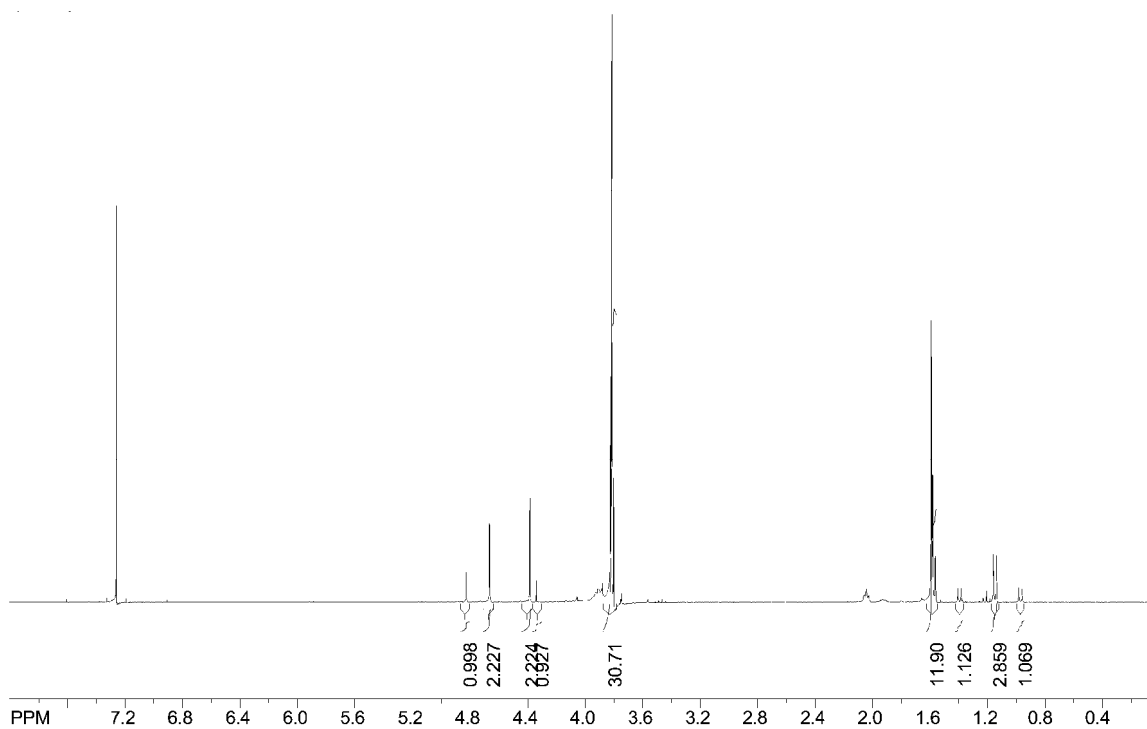

**Figure S7:**  $^1\text{H}$  NMR spectrum of tetramethyl 2-(1-hydroxyethyl-2- $^{13}\text{C}$ )-4-methyl-3-oxatricyclo[3.2.2.0<sup>2,4</sup>]nona-6,8-diene-6,7,8,9-tetracarboxylate (**10a**)

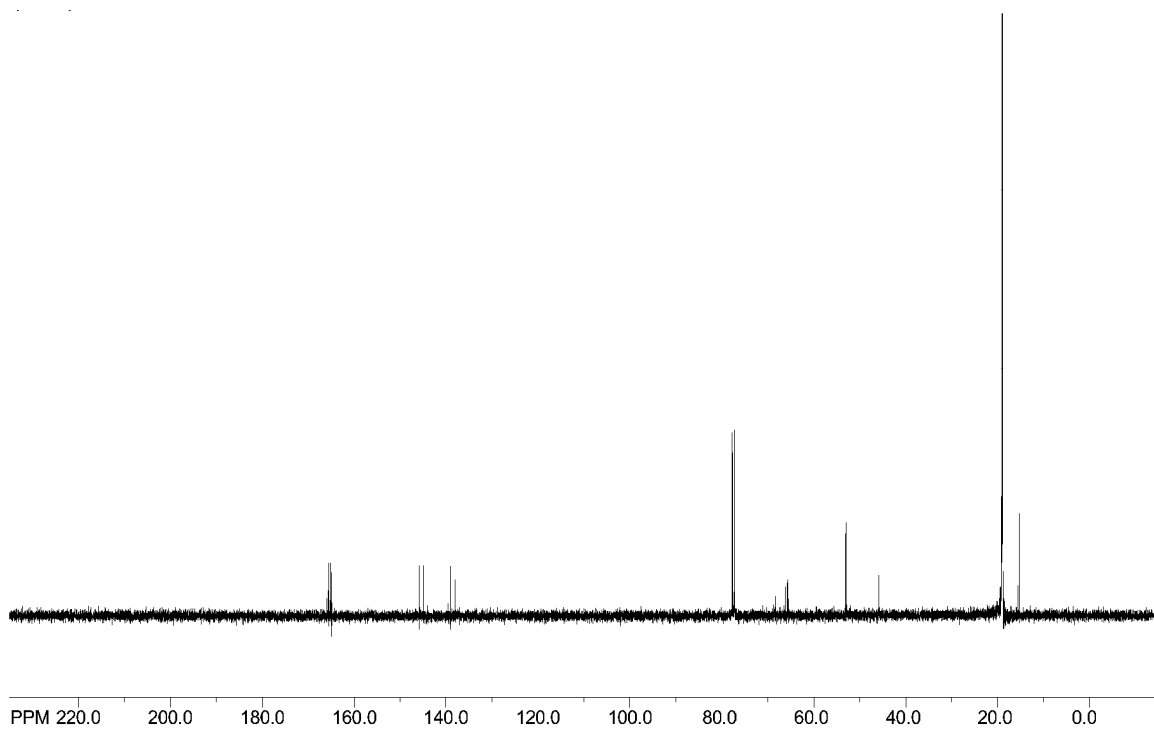

**Figure S8:**  $^{13}\text{C}$  NMR spectrum of tetramethyl 2-(1-hydroxyethyl-2- $^{13}\text{C}$ )-4-methyl-3-oxatricyclo[3.2.2.0 $^{2,4}$ ]nona-6,8-diene-6,7,8,9-tetracarboxylate (**10a**)

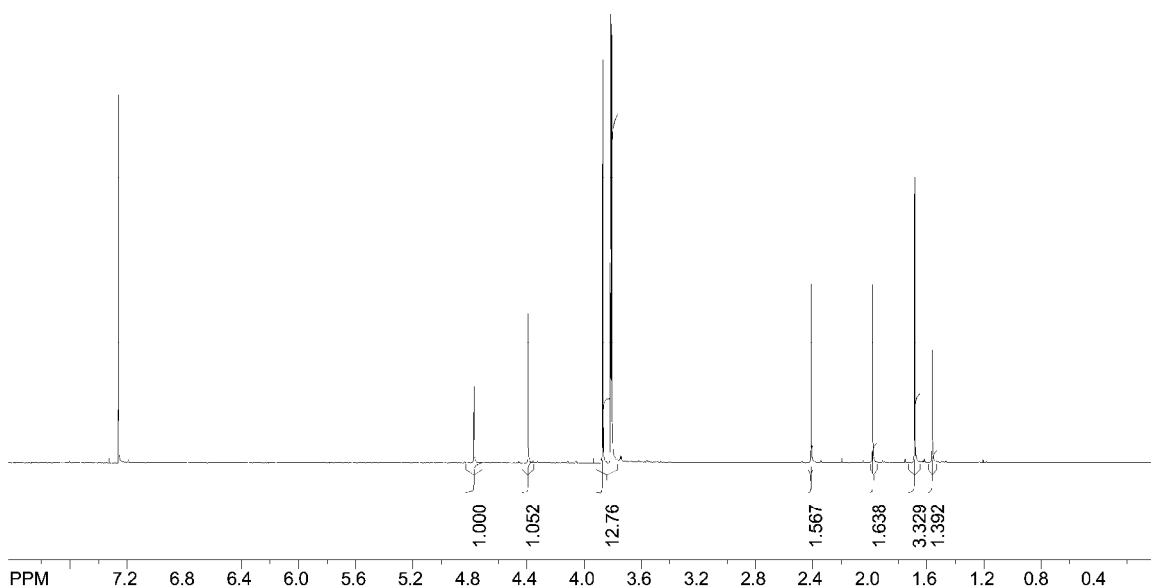

**Figure S9:**  $^1\text{H}$  NMR spectrum of tetramethyl 2-(acetyl-2- $^{13}\text{C}$ )-4-methyl-3-oxatricyclo[3.2.2.0 $^{2,4}$ ]nona-6,8-diene-6,7,8,9-tetracarboxylate (**1a**)

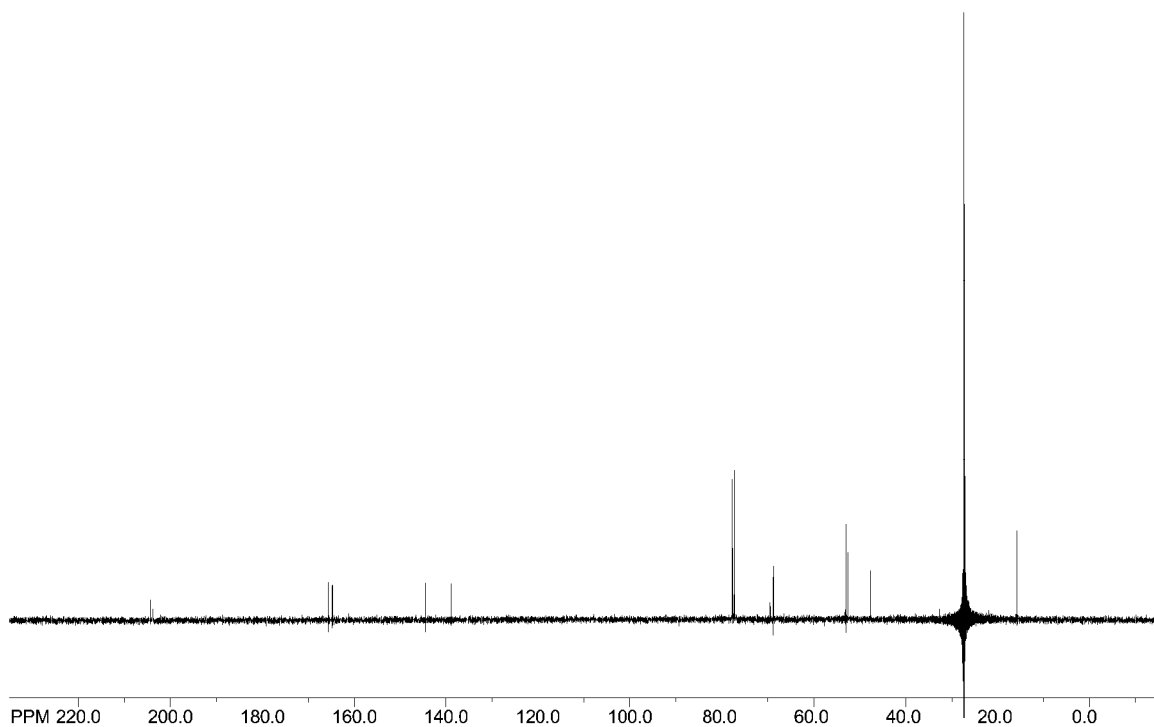

**Figure S10:**  $^{13}\text{C}$  NMR spectrum of tetramethyl 2-(acetyl-2- $^{13}\text{C}$ )-4-methyl-3-oxatricyclo[3.2.2.0<sup>2,4</sup>]nona-6,8-diene-6,7,8,9-tetracarboxylate (**1a**)

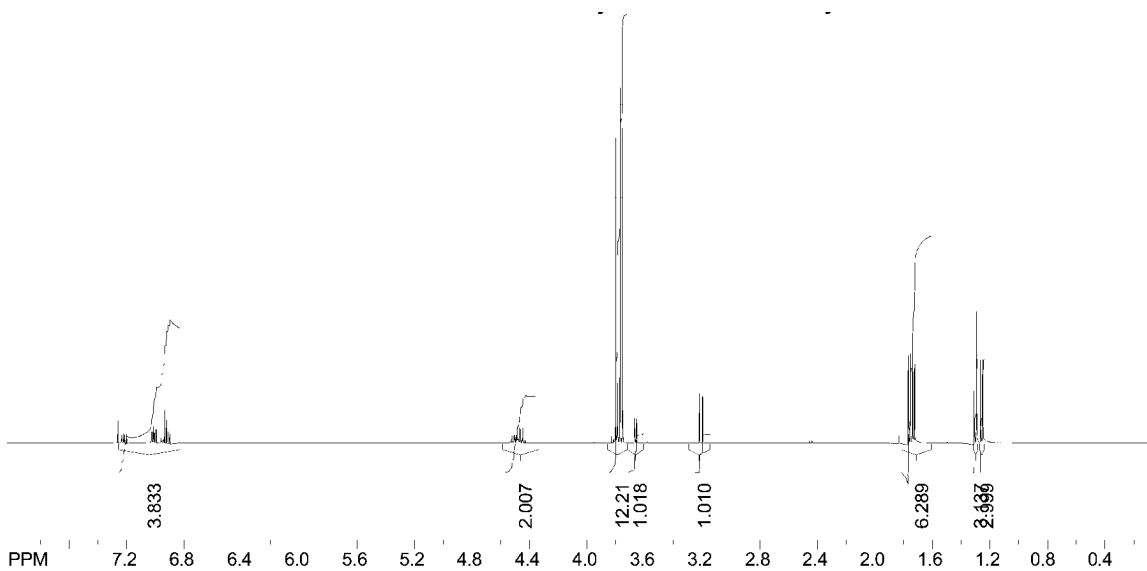

**Figure S11:**  $^1\text{H}$  NMR spectrum of dimethyl 1-(1-hydroxyethyl)-4-methyl-7-oxabicyclo[2.2.1]hepta-2,5-diene-2,3-dicarboxylate-4- $^{13}\text{C}$  (**7b**)

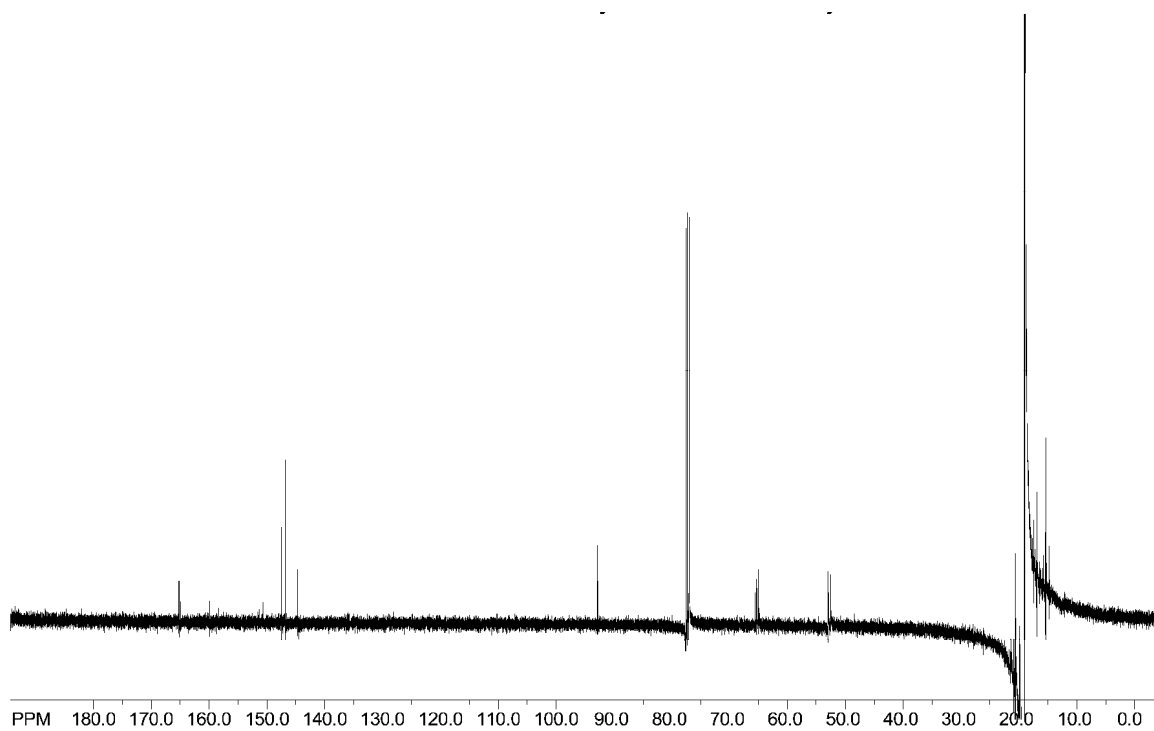

**Figure S12:**  $^{13}\text{C}$  NMR spectrum of dimethyl 1-(1-hydroxyethyl)-4-methyl-7-oxabicyclo[2.2.1]hepta-2,5-diene-2,3-dicarboxylate- $^{13}\text{C}$  (**7b**)

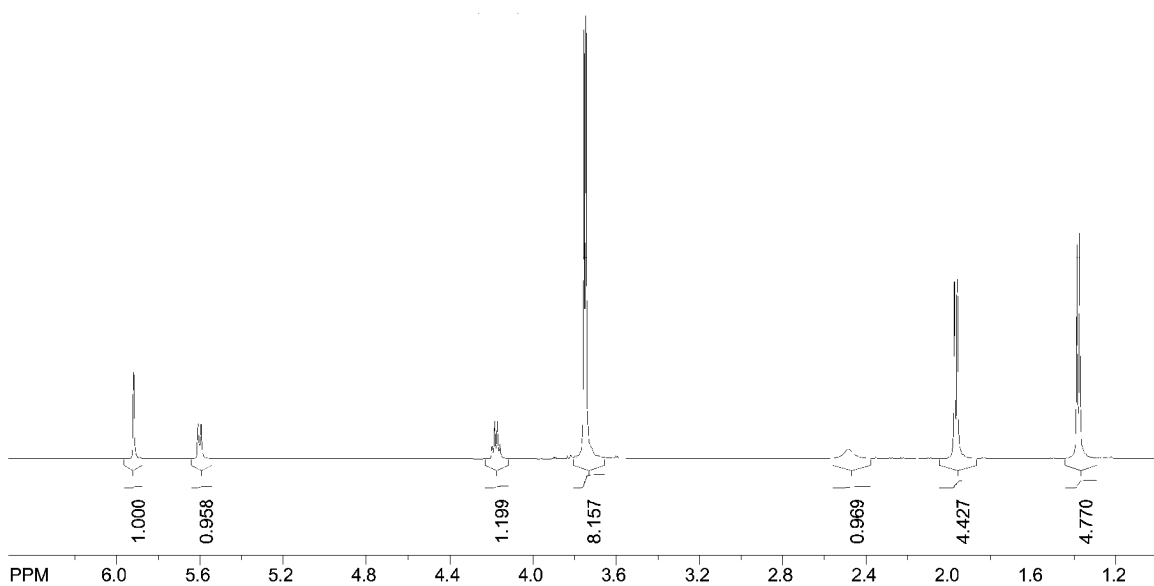

**Figure S13:**  $^1\text{H}$  NMR spectrum of dimethyl 2-acetyl-7-methyl-7-oxepin-4,5-dicarboxylate- $^{13}\text{C}$  (**9b**)



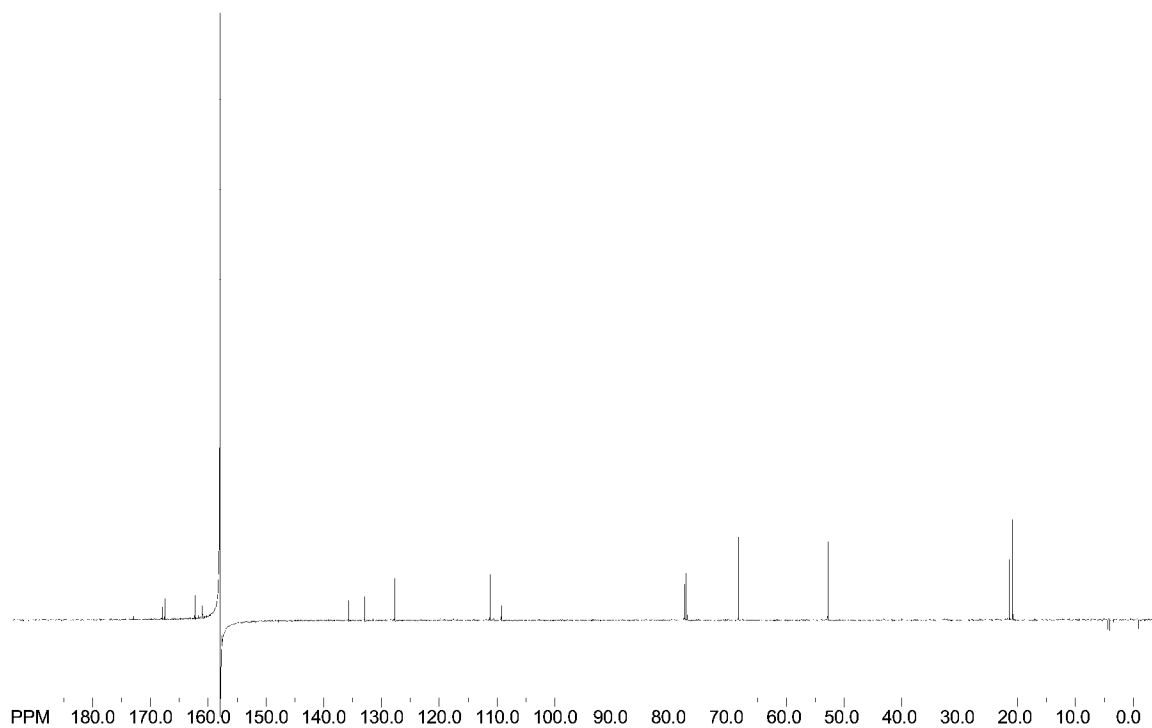

**Figure S14:**  $^{13}\text{C}$  NMR spectrum of dimethyl 2-acetyl-7-methyl-7-oxepin-4,5-dicarboxylate- $^{13}\text{C}$  (**9b**)

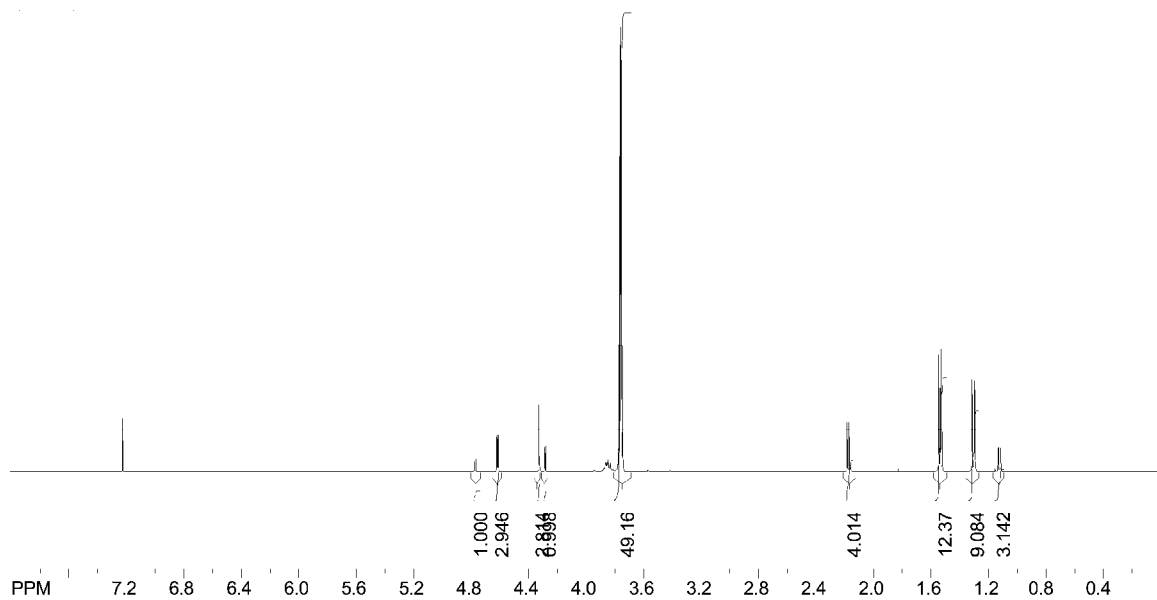

**Figure S15:**  $^1\text{H}$  NMR spectrum of tetramethyl 2-(1-hydroxyethyl)-4-methyl-3-oxatricyclo[3.2.2.0<sup>2,4</sup>]nona-6,8-diene-6,7,8,9-tetra-carboxylate-4- $^{13}\text{C}$  (**10b**)

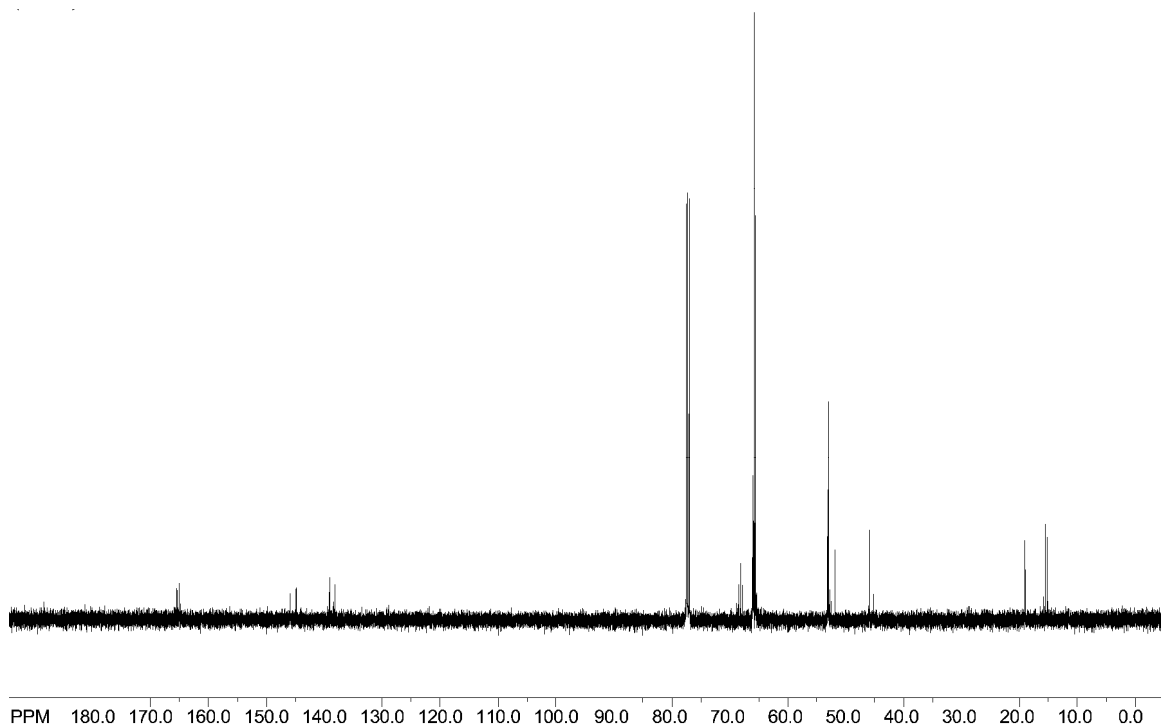

**Figure S16:**  $^{13}\text{C}$  NMR spectrum of tetramethyl 2-(1-hydroxyethyl)-4-methyl-3-oxatricyclo[3.2.2.0<sup>2,4</sup>]nona-6,8-diene-6,7,8,9-tetra-carboxylate-4- $^{13}\text{C}$  (**10b**)

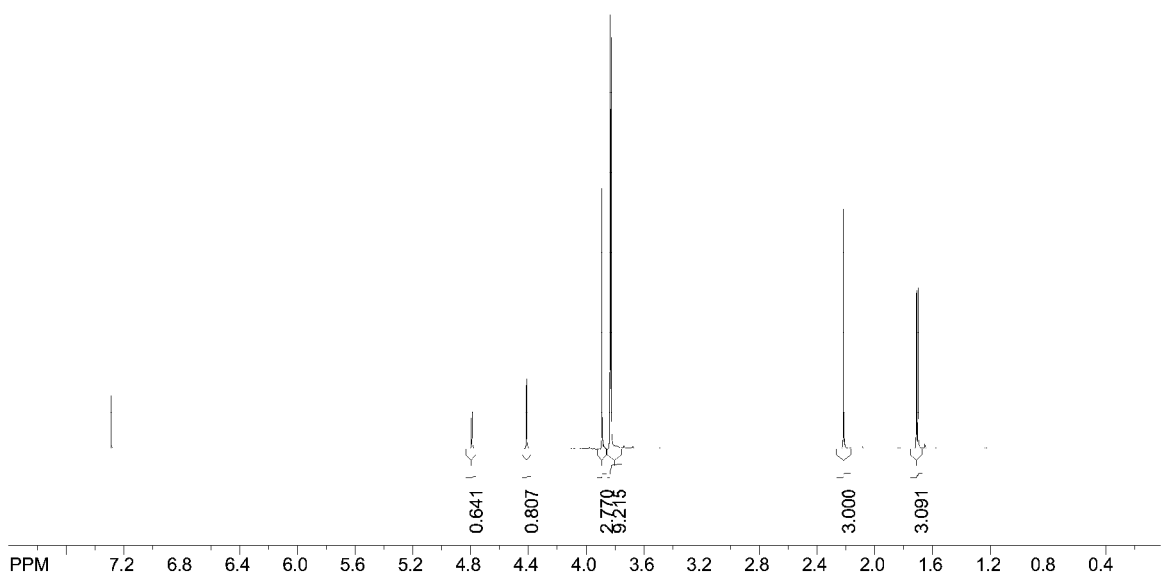

**Figure S17:**  $^1\text{H}$  NMR spectrum of tetramethyl 2-acetyl-4-methyl-3-oxatricyclo[3.2.2.0<sup>2,4</sup>]nona-6,8-diene-6,7,8,9-tetracarboxylate-4- $^{13}\text{C}$  (**1b**)

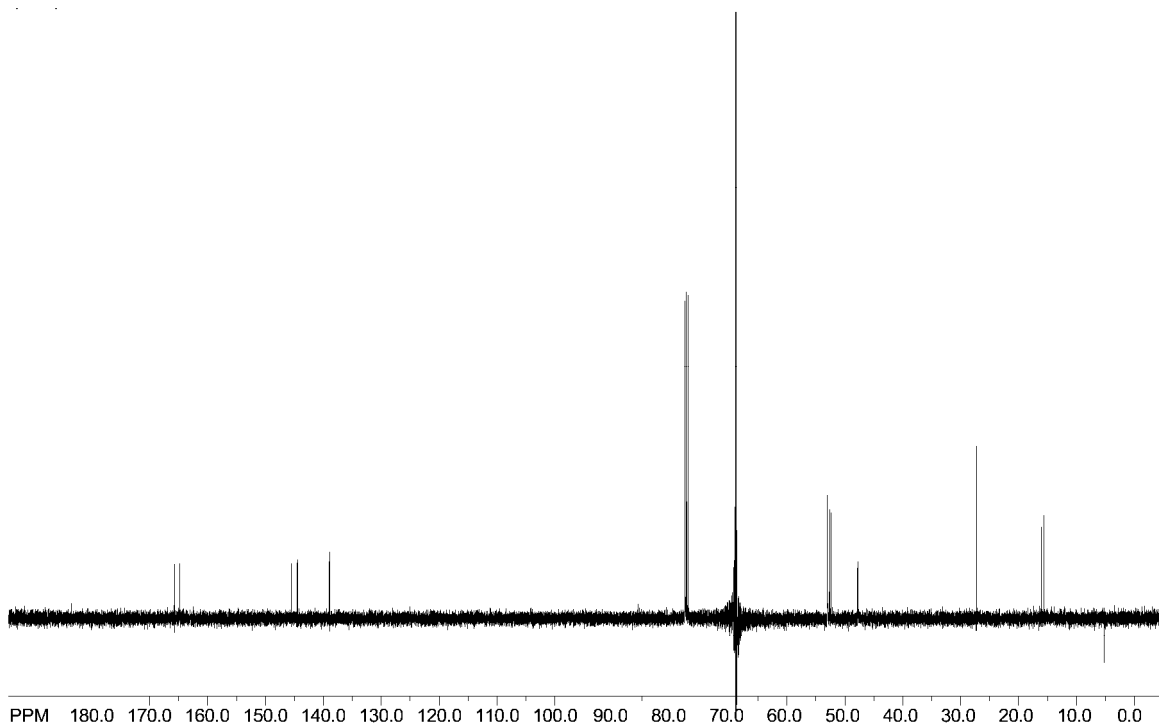

**Figure S18:**  $^{13}\text{C}$  NMR spectrum of tetramethyl 2-acetyl-4-methyl-3-oxatricyclo[3.2.2.0<sup>2,4</sup>]nona-6,8-diene-6,7,8,9-tetracarboxylate-4- $^{13}\text{C}$  (**1b**)

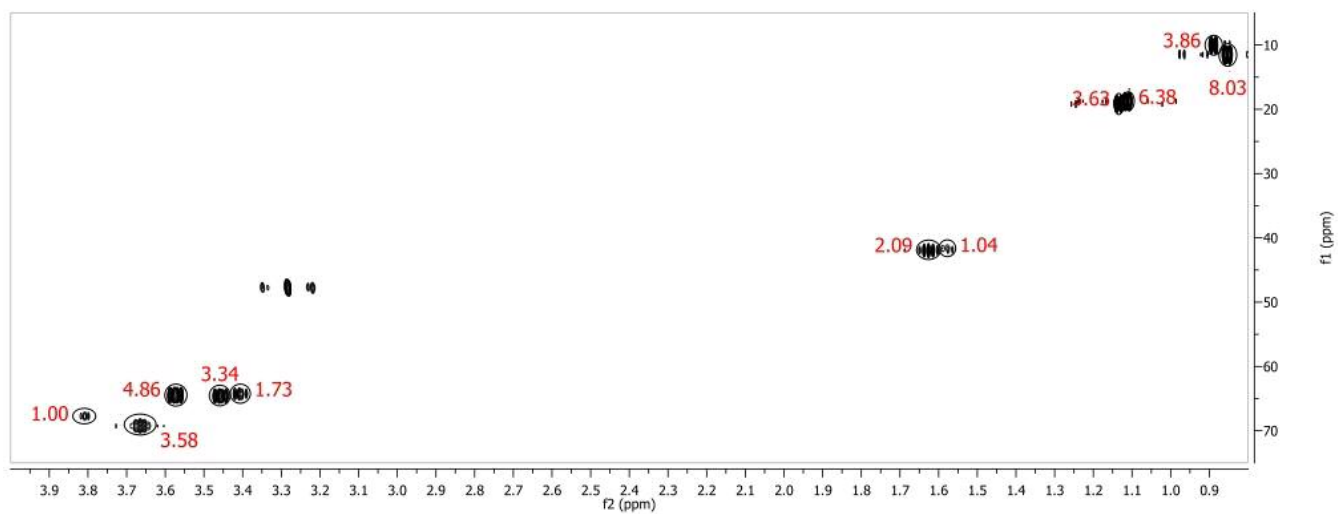

**Figure S19:** HSQC-AD spectrum of 2-methylbutane-1,3-diol (**16**)

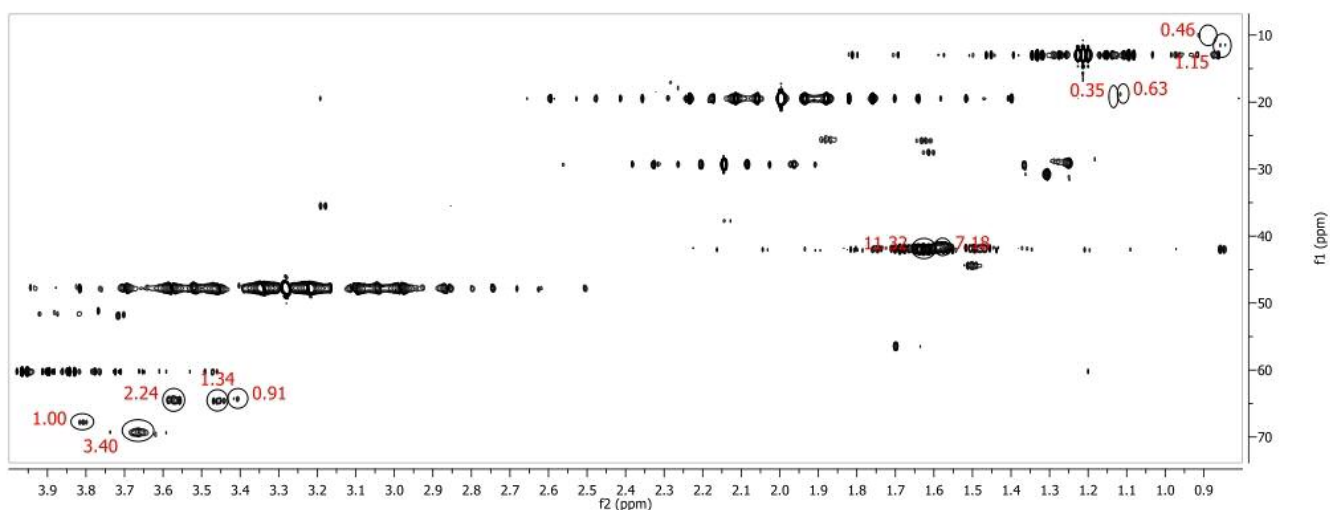

**Figure S20:** HSQC-AD spectrum of  $^{13}\text{C}$ -labeled 2-methylbutane-1,3-diols derived from thermolysis of compound **1b**, followed by methanol trapping and DIBAL reduction

## COMPUTATIONAL WORK

Coupled cluster calculations were carried out with MOLPRO.<sup>1</sup> All DFT calculations were carried out with Gaussian 03.<sup>2b</sup>

### Acetylmethyloxirene/benzene adduct; MPWB1K/6-31+G(d,p):

|   |           |           |           |
|---|-----------|-----------|-----------|
| O | -0.321607 | 0.872813  | -1.252778 |
| C | -0.472587 | -0.171941 | -0.307572 |
| C | 0.180980  | 1.078603  | 0.048907  |
| C | 0.536498  | -1.343065 | -0.309083 |
| C | 1.695565  | 0.824003  | 0.265620  |
| C | 1.102864  | -1.317961 | 1.095623  |
| C | 1.718275  | -0.184193 | 1.396482  |
| C | 1.625384  | -0.972694 | -1.273192 |
| C | 2.231146  | 0.164636  | -0.974098 |
| H | 0.040977  | -2.278514 | -0.540753 |
| H | 2.207228  | 1.749463  | 0.511932  |
| H | 0.984379  | -2.159409 | 1.757218  |
| H | 2.190726  | 0.031882  | 2.340808  |
| H | 1.828232  | -1.567277 | -2.148763 |
| H | 2.999611  | 0.629231  | -1.569959 |
| C | -1.866562 | -0.529635 | 0.083213  |
| O | -2.046013 | -1.447599 | 0.845931  |
| C | -2.990108 | 0.212493  | -0.565478 |
| H | -3.911772 | 0.016107  | -0.030838 |
| H | -2.793292 | 1.275308  | -0.647289 |
| H | -3.082524 | -0.154713 | -1.587672 |
| C | -0.408279 | 2.182000  | 0.863436  |
| H | -0.135753 | 2.050989  | 1.907706  |
| H | -0.016300 | 3.139427  | 0.526381  |
| H | -1.489614 | 2.212315  | 0.792858  |

Energy: -576.510967

Enthalpy: -576.288998

Retro-Diels-Alder transition state for acetylmethyloxirene/benzene adduct; MPWB1K/6-31+G(d,p):

|   |           |           |           |
|---|-----------|-----------|-----------|
| O | 0.453338  | 1.111069  | 1.221689  |
| C | 0.706869  | 0.148586  | 0.120332  |
| C | -0.020714 | 1.241469  | -0.075289 |
| C | -0.578552 | -1.643550 | 0.321929  |
| C | -2.224912 | 0.414583  | -0.189511 |
| C | -1.081085 | -1.510506 | -0.997777 |
| C | -1.905448 | -0.460764 | -1.252428 |
| C | -1.282488 | -1.078848 | 1.401567  |
| C | -2.104596 | -0.021968 | 1.138188  |
| H | 0.140406  | -2.425711 | 0.516854  |
| H | -2.825025 | 1.288828  | -0.397738 |
| H | -0.714669 | -2.154538 | -1.779971 |
| H | -2.246164 | -0.242222 | -2.252784 |
| H | -1.066977 | -1.384098 | 2.412530  |
| H | -2.565040 | 0.537810  | 1.936681  |
| C | 2.010520  | -0.350329 | -0.265315 |
| O | 2.167232  | -0.987602 | -1.284533 |
| C | 3.111674  | -0.053685 | 0.705121  |
| H | 4.066549  | -0.234736 | 0.225938  |
| H | 3.040392  | 0.967874  | 1.070477  |
| H | 3.013929  | -0.704586 | 1.572433  |
| C | -0.168646 | 2.478052  | -0.851011 |
| H | -0.387222 | 2.244391  | -1.887409 |
| H | -0.960905 | 3.101849  | -0.448944 |
| H | 0.764438  | 3.039169  | -0.800164 |

Energy: -576.419828

Enthalpy: -576.201861

TS for Singelton rearrangement of acetylmethyloxirene/benzene adduct to 7-methyl-7-pyruvoylnorcaradiene; MPWB1K/6-31+G(d,p):

|   |           |           |           |
|---|-----------|-----------|-----------|
| O | -0.490511 | 0.273025  | -1.730923 |
| C | -0.428703 | -0.142086 | -0.495134 |
| C | 0.297959  | 1.013295  | 0.068681  |
| C | 0.545010  | -1.397542 | -0.063676 |
| C | 1.764108  | 0.875374  | 0.118615  |
| C | 0.832855  | -0.992457 | 1.322300  |
| C | 1.384485  | 0.239077  | 1.445111  |
| C | 1.748767  | -1.254716 | -0.925841 |
| C | 2.363575  | -0.087917 | -0.840875 |
| H | 0.038930  | -2.350564 | -0.147123 |
| H | 2.284300  | 1.818583  | 0.225638  |
| H | 0.521618  | -1.581504 | 2.167941  |
| H | 1.555655  | 0.745649  | 2.379833  |
| H | 2.030769  | -2.038105 | -1.609325 |
| H | 3.217580  | 0.204100  | -1.428551 |
| C | -1.778546 | -0.434434 | 0.181083  |
| O | -1.846183 | -0.954723 | 1.268981  |
| C | -2.976294 | -0.041869 | -0.612563 |
| H | -3.881624 | -0.306185 | -0.079656 |
| H | -2.942430 | 1.024935  | -0.824508 |
| H | -2.926662 | -0.523133 | -1.586355 |
| C | -0.358724 | 2.310638  | 0.360671  |
| H | 0.314572  | 2.978294  | 0.889757  |

|   |           |          |           |
|---|-----------|----------|-----------|
| H | -0.619435 | 2.775545 | -0.586825 |
| H | -1.266673 | 2.181794 | 0.944480  |

Energy: -576.450983  
 Enthalpy: -576.232147

TS for Singelton rearrangement of acetylmethyloxirene/benzene adduct to 7,7-diacetylnorcaradiene;  
MPWB1K/6-31+G(d,p):

|   |           |           |           |
|---|-----------|-----------|-----------|
| O | 0.050846  | 1.361441  | -1.311695 |
| C | -0.223559 | 1.089740  | -0.080631 |
| C | 0.423500  | -0.240175 | -0.056583 |
| C | -1.842592 | 0.604026  | 0.340662  |
| C | -0.402819 | -1.424575 | -0.389256 |
| C | -1.487357 | -0.278999 | 1.434608  |
| C | -0.632315 | -1.284509 | 1.099075  |
| C | -2.325730 | -0.123634 | -0.851319 |
| C | -1.598391 | -1.165943 | -1.218771 |
| H | -2.431546 | 1.468748  | 0.618968  |
| H | 0.197712  | -2.285513 | -0.647909 |
| H | -1.744036 | -0.063241 | 2.460227  |
| H | -0.139321 | -1.946946 | 1.789389  |
| H | -3.186551 | 0.232554  | -1.392719 |
| H | -1.798222 | -1.786568 | -2.075739 |
| C | 0.157860  | 2.119950  | 0.966676  |
| C | 1.888284  | -0.465324 | 0.030268  |
| H | 0.004422  | 1.759693  | 1.980899  |
| H | -0.446071 | 3.009994  | 0.812298  |
| H | 1.198330  | 2.408934  | 0.850009  |
| O | 2.272401  | -1.451205 | 0.619105  |
| C | 2.817600  | 0.475493  | -0.656973 |
| H | 2.508903  | 1.508543  | -0.551100 |
| H | 3.822580  | 0.309935  | -0.285775 |
| H | 2.780931  | 0.265688  | -1.724350 |

Energy: -576.446398  
 Enthalpy: -576.227499

Endo-7-methyl-7-pyruvoylnorcaradiene; MPWB1K/6-31+G(d,p):

|   |           |           |           |
|---|-----------|-----------|-----------|
| O | -0.625319 | -0.087932 | -1.882714 |
| C | -0.689473 | 0.241645  | -0.728623 |
| C | 0.281698  | 1.162913  | -0.066475 |
| C | 1.103029  | -1.772354 | 0.769120  |
| C | 1.741192  | 0.854957  | -0.151530 |
| C | 0.733255  | -0.744402 | 1.550148  |
| C | 0.954401  | 0.649397  | 1.161004  |
| C | 1.902574  | -1.572918 | -0.416072 |
| C | 2.260353  | -0.343324 | -0.805380 |
| H | 0.892434  | -2.782806 | 1.086283  |
| H | 2.366916  | 1.733997  | -0.215265 |
| H | 0.268387  | -0.927294 | 2.507424  |
| H | 1.083832  | 1.363469  | 1.961717  |
| H | 2.280592  | -2.438566 | -0.937164 |
| H | 2.970273  | -0.208291 | -1.607100 |
| C | -1.887646 | -0.215253 | 0.110420  |
| O | -2.207165 | 0.428149  | 1.076674  |
| C | -2.620189 | -1.411465 | -0.387579 |
| H | -2.892574 | -1.270079 | -1.430043 |

|   |           |           |           |
|---|-----------|-----------|-----------|
| H | -1.956388 | -2.273757 | -0.354707 |
| H | -3.496297 | -1.587639 | 0.224332  |
| C | -0.137289 | 2.608519  | -0.108856 |
| H | 0.607622  | 3.223353  | 0.391275  |
| H | -0.228044 | 2.955897  | -1.135651 |
| H | -1.088316 | 2.743695  | 0.400150  |

Energy: -576.526850

Enthalpy: -576.305217

TS for methylpyruvoylcarbene extrusion from *endo*-7-methyl-7-pyruvoylnorcaradiene:

MPWB1K/6-31+G(d,p):

|   |           |           |           |
|---|-----------|-----------|-----------|
| O | 0.406838  | -1.213264 | -0.535580 |
| C | 1.010250  | -0.227037 | -0.153259 |
| C | 0.794067  | 0.946906  | 0.483519  |
| C | -2.838477 | -0.960273 | -0.770259 |
| C | -1.664384 | 0.904110  | 0.913854  |
| C | -2.489856 | 0.284248  | -1.259355 |
| C | -1.912089 | 1.220877  | -0.418066 |
| C | -2.585830 | -1.284571 | 0.554274  |
| C | -1.995001 | -0.360988 | 1.392767  |
| H | -3.291615 | -1.688651 | -1.424694 |
| H | -1.307544 | 1.657768  | 1.599064  |
| H | -2.675931 | 0.531305  | -2.293019 |
| H | -1.677328 | 2.206273  | -0.791334 |
| H | -2.843171 | -2.263404 | 0.927850  |
| H | -1.798375 | -0.609509 | 2.424133  |
| C | 2.607896  | -0.370602 | -0.118469 |
| O | 3.365427  | 0.478367  | -0.489333 |
| C | 3.012065  | -1.748839 | 0.284770  |
| H | 2.608817  | -1.971907 | 1.269418  |
| H | 2.574191  | -2.463957 | -0.404513 |
| H | 4.093344  | -1.816134 | 0.284690  |
| C | 1.113415  | 2.318998  | 0.158859  |
| H | 0.897209  | 3.022674  | 0.956893  |
| H | 2.205337  | 2.265531  | 0.034155  |
| H | 0.724604  | 2.672207  | -0.795148 |

Energy: -576.439078

Enthalpy: -576.221828

Benzene; MPWB1K/6-31+G(d,p):

|   |           |           |          |
|---|-----------|-----------|----------|
| C | 0.000000  | 1.385234  | 0.000000 |
| C | 1.199648  | 0.692617  | 0.000000 |
| C | 1.199648  | -0.692617 | 0.000000 |
| C | 0.000000  | -1.385234 | 0.000000 |
| C | -1.199648 | -0.692617 | 0.000000 |
| C | -1.199648 | 0.692617  | 0.000000 |
| H | 0.000000  | 2.464214  | 0.000000 |
| H | 2.134072  | 1.232107  | 0.000000 |
| H | 2.134072  | -1.232107 | 0.000000 |
| H | 0.000000  | -2.464214 | 0.000000 |
| H | -2.134072 | -1.232107 | 0.000000 |
| H | -2.134072 | 1.232107  | 0.000000 |

Energy: -232.137687

Enthalpy: -232.029118

Acetylmethyloxirene (2); MPWB1K/6-31+G(d,p):

|   |           |           |           |
|---|-----------|-----------|-----------|
| C | -0.093931 | 0.050009  | -0.000465 |
| C | -1.375514 | -0.025136 | -0.000102 |
| C | 1.303967  | 0.334246  | -0.000063 |
| O | -0.938227 | -1.303077 | -0.000168 |
| O | 1.693365  | 1.484327  | -0.000042 |
| C | -2.725161 | 0.515630  | 0.000268  |
| C | 2.208308  | -0.855667 | 0.000283  |
| H | -3.252640 | 0.150030  | -0.877876 |
| H | -3.252124 | 0.150073  | 0.878742  |
| H | -2.708799 | 1.598514  | 0.000238  |
| H | 3.237287  | -0.516684 | 0.000867  |
| H | 2.014104  | -1.473338 | 0.874420  |
| H | 2.015049  | -1.473082 | -0.874244 |

Energy: -344.308035

Enthalpy: -344.199534

Diacetylcarbene C<sub>2</sub> (3); MPWB1K/6-31+G(d,p):

|   |           |           |           |
|---|-----------|-----------|-----------|
| C | .000000   | .000000   | .820634   |
| C | .725280   | .993739   | .120581   |
| C | -.725280  | -.993739  | .120581   |
| C | -2.130500 | -.877262  | -.330209  |
| C | 2.130500  | .877262   | -.330209  |
| H | -2.786928 | -.942907  | .534624   |
| H | 2.786928  | .942907   | .534624   |
| H | -2.299405 | .088689   | -.800033  |
| H | 2.299405  | -.088689  | -.800033  |
| H | 2.353236  | 1.687333  | -1.016007 |
| H | -2.353236 | -1.687333 | -1.016007 |
| O | .000000   | 1.973775  | .009660   |
| O | .000000   | -1.973775 | .009660   |

Energy: -344.308822

Enthalpy: -344.201722

Diacetylcarbene C<sub>1</sub> (3); MPWB1K/6-31+G(d,p):

|   |           |           |           |
|---|-----------|-----------|-----------|
| C | 2.005103  | 0.889789  | 0.337215  |
| C | -0.033409 | -0.104585 | -0.785952 |
| C | 1.216902  | -0.292872 | -0.105542 |
| C | -1.222140 | 0.149825  | -0.125662 |
| O | -1.128880 | 1.384724  | -0.091456 |
| C | -2.334928 | -0.690249 | 0.345137  |
| O | 1.560414  | -1.453502 | 0.013481  |
| H | 2.433233  | 1.380751  | -0.533695 |
| H | 2.799891  | 0.554112  | 0.993990  |
| H | 1.362219  | 1.612511  | 0.833716  |
| H | -2.991907 | -0.101482 | 0.975594  |
| H | -1.955113 | -1.555708 | 0.881021  |
| H | -2.889762 | -1.051405 | -0.518005 |

Energy: -344.308969

Enthalpy: -344.200815



Diacetylcarbene C<sub>2</sub> (3); B3LYP/6-31+G(d,p):

|   |           |           |           |
|---|-----------|-----------|-----------|
| C | 0.000000  | 0.000000  | 0.732237  |
| C | 0.741187  | 1.027471  | 0.104874  |
| C | -0.741187 | -1.027471 | 0.104874  |
| C | -2.179872 | -0.959970 | -0.301010 |
| C | 2.179872  | 0.959970  | -0.301010 |
| H | -2.810413 | -1.024347 | 0.592933  |
| H | 2.810413  | 1.024347  | 0.592933  |
| H | -2.399133 | -0.007403 | -0.793929 |
| H | 2.399133  | 0.007403  | -0.793929 |
| H | 2.406007  | 1.799993  | -0.962034 |
| H | -2.406007 | -1.799993 | -0.962034 |
| O | 0.000000  | 2.024166  | 0.017892  |
| O | 0.000000  | -2.024166 | 0.017892  |

Energy: -344.498305

Enthalpy: -344.392847

Diacetylcarbene C<sub>2</sub> (3); O3LYP/6-31+G(d,p):

|   |           |           |          |
|---|-----------|-----------|----------|
| C | .000000   | .000000   | .669397  |
| C | .754803   | 1.036518  | .092799  |
| C | -.754803  | -1.036518 | .092799  |
| C | -2.198821 | -1.001944 | -.293456 |
| C | 2.198821  | 1.001944  | -.293456 |
| H | -2.815027 | -1.071800 | .609624  |
| H | 2.815027  | 1.071800  | .609624  |
| H | -2.447879 | -.061181  | -.792750 |
| H | 2.447879  | .061181   | -.792750 |
| H | 2.419861  | 1.853271  | -.940975 |
| H | -2.419861 | -1.853271 | -.940975 |
| O | .000000   | 2.029497  | .039982  |
| O | .000000   | -2.029497 | .039982  |

Energy: -344.384449

Enthalpy: -344.279016

Diacetylcarbene C<sub>2</sub> (3); CCSD(T)/cc-pVTZ//CCSD/cc-pVDZ:

|   |           |           |           |
|---|-----------|-----------|-----------|
| C | 0.000000  | 0.000000  | 0.929478  |
| C | 0.712105  | 0.992870  | 0.130345  |
| C | -0.712105 | -0.992870 | 0.130345  |
| C | -2.133702 | -0.805783 | -0.326046 |
| C | 2.133702  | 0.805783  | -0.326046 |
| H | -2.390152 | -1.581599 | -1.065002 |
| H | 2.390152  | 1.581599  | -1.065002 |
| H | -2.804146 | -0.887240 | 0.547791  |
| H | 2.804146  | 0.887240  | 0.547791  |
| H | 2.256424  | -0.204958 | -0.753570 |
| H | -2.256424 | 0.204958  | -0.753570 |
| O | 0.000000  | 1.980535  | -0.042931 |
| O | 0.000000  | -1.980535 | -0.042931 |

CCSD(T) Energy: -343.906259

CCSD Energy: -343.527674

CCSD Enthalpy: -343.424154

TS between diacetylcarbene (3) and acetylmethylketene (4) MPWB1K/6-31+G(d,p):

|   |           |           |           |
|---|-----------|-----------|-----------|
| C | -1.884555 | 1.038712  | -0.102063 |
| C | -0.006472 | -0.107353 | 0.748501  |
| C | -1.241636 | -0.315839 | 0.093570  |
| C | 1.210801  | 0.223316  | 0.095211  |
| O | 1.448608  | 1.383754  | -0.181569 |
| C | 2.140771  | -0.927027 | -0.132169 |
| O | -1.736082 | -1.376307 | -0.216894 |
| H | -2.682744 | 1.149027  | 0.626073  |
| H | -2.298267 | 1.048782  | -1.106521 |
| H | -1.179809 | 1.861079  | 0.011543  |
| H | 2.611923  | -0.789268 | -1.100609 |
| H | 1.629127  | -1.886552 | -0.100663 |
| H | 2.906105  | -0.913488 | 0.639582  |

Energy: -344.30474

Enthalpy: -344.198210

Acetylmethylketene (4) MPWB1K/6-31+G(d,p):

|   |           |           |           |
|---|-----------|-----------|-----------|
| C | 0.298994  | 1.989959  | 0.025548  |
| C | 0.280253  | 0.490095  | 0.001370  |
| C | 1.395526  | -0.212991 | -0.007204 |
| C | -1.010643 | -0.203491 | -0.016025 |
| O | -2.029023 | 0.449316  | -0.035879 |
| C | -1.037859 | -1.703534 | 0.027318  |
| O | 2.371801  | -0.828179 | -0.018794 |
| H | -0.278104 | 2.368710  | -0.813066 |
| H | 1.307662  | 2.385249  | -0.033182 |
| H | -0.167525 | 2.351855  | 0.937617  |
| H | -0.929690 | -2.033766 | 1.058951  |
| H | -0.236737 | -2.152653 | -0.554777 |
| H | -1.995456 | -2.048718 | -0.344203 |

Energy: -344.413428

Enthalpy: -344.302663

TS between acetylmethyloxirene (2) and methylpyruvoylcarbene (13) MPWB1K/6-31+G(d,p):

|   |           |           |           |
|---|-----------|-----------|-----------|
| C | -2.311126 | -0.573906 | 0.148662  |
| C | -1.180456 | 0.378797  | -0.008275 |
| O | -1.280781 | 1.576854  | -0.062454 |
| C | 0.171050  | -0.248092 | -0.088826 |
| O | 0.473397  | -1.498975 | -0.093172 |
| C | 1.398045  | 0.165462  | -0.279701 |
| C | 2.744016  | 0.360933  | 0.185289  |
| H | -2.154134 | -1.189421 | 1.032408  |
| H | -2.330638 | -1.256525 | -0.698885 |
| H | -3.244902 | -0.030812 | 0.222690  |
| H | 3.494590  | 0.085258  | -0.550172 |
| H | 2.922996  | -0.163778 | 1.124064  |
| H | 2.841989  | 1.433079  | 0.372012  |

Energy: -344.289704

Enthalpy: -344.182902

Methylpyruvoylcarbene (13) MPWB1K/6-31+G(d,p):

|   |           |           |           |
|---|-----------|-----------|-----------|
| O | -0.205586 | 1.813770  | -0.232936 |
| C | 0.163116  | 0.690500  | 0.069102  |
| C | 1.399760  | 0.296277  | 0.589998  |
| C | -0.841624 | -0.487713 | 0.011013  |
| O | -0.441087 | -1.614376 | -0.130066 |
| C | -2.271515 | -0.088850 | 0.069636  |
| H | -2.490559 | 0.294680  | 1.064908  |
| H | -2.454068 | 0.727708  | -0.622582 |
| H | -2.898496 | -0.945091 | -0.146856 |
| C | 2.423362  | -0.361821 | -0.147369 |
| H | 3.373002  | -0.488958 | 0.358911  |
| H | 1.882813  | -1.339668 | -0.095682 |
| H | 2.522105  | -0.134185 | -1.208964 |

Energy: -344.297414

Enthalpy: -344.190692

Methylpyruvoylcarbene (13) CCSD(T)/cc-pVTZ//CCSD/cc-pVDZ:

|   |           |           |           |
|---|-----------|-----------|-----------|
| O | -0.040745 | 1.786888  | 0.078237  |
| C | -0.197460 | 0.593737  | -0.159360 |
| C | -1.461888 | 0.075639  | -0.678427 |
| C | 0.938201  | -0.440990 | -0.037593 |
| O | 0.641349  | -1.623198 | -0.058053 |
| C | 2.335469  | 0.104281  | 0.139609  |
| H | 2.633050  | 0.644903  | -0.777017 |
| H | 2.348640  | 0.837989  | 0.963150  |
| H | 3.035025  | -0.722145 | 0.336163  |
| C | -2.435940 | -0.381345 | 0.331702  |
| H | -3.470648 | -0.459970 | -0.037114 |
| H | -2.040756 | -1.423756 | 0.452788  |
| H | -2.380436 | 0.105532  | 1.324976  |

CCSD(T) Energy: -343.892344

TS for acetyl migration in methylpyruvoylcarbene; CCSD(T)/cc-pVTZ//CCSD/cc-pVDZ:

|   |           |           |           |
|---|-----------|-----------|-----------|
| O | -0.341458 | 1.829568  | -0.439652 |
| C | 0.176548  | 0.814402  | -0.002251 |
| C | 1.311918  | 0.380165  | 0.716215  |
| C | -0.750980 | -0.524299 | -0.031488 |
| O | -0.359680 | -1.595999 | -0.433886 |
| C | -2.186149 | -0.210832 | 0.344056  |
| H | -2.217365 | 0.131864  | 1.393965  |
| H | -2.556631 | 0.611937  | -0.288500 |
| H | -2.798312 | -1.116772 | 0.213410  |
| C | 2.359574  | -0.388981 | 0.010623  |
| H | 3.225169  | -0.633814 | 0.646676  |
| H | 1.820316  | -1.335636 | -0.242094 |
| H | 2.670466  | 0.051135  | -0.958080 |

CCSD(T) Energy: -343.893324

TS connecting methylpyruvoylcarbene and diacetylcarbene; CCSD(T)/cc-pVTZ//CCSD/cc-pVDZ:

|   |           |           |           |
|---|-----------|-----------|-----------|
| C | -2.331999 | -0.653862 | 0.140962  |
| C | -1.230736 | 0.372879  | -0.003999 |

|   |           |           |           |
|---|-----------|-----------|-----------|
| O | -1.395658 | 1.576037  | -0.062271 |
| C | 0.157318  | -0.196298 | -0.072061 |
| O | 0.575825  | -1.458154 | -0.106914 |
| C | 1.405411  | 0.186641  | -0.235852 |
| C | 2.806636  | 0.373909  | 0.169288  |
| H | -2.152325 | -1.265356 | 1.043569  |
| H | -2.306457 | -1.342458 | -0.722705 |
| H | -3.307816 | -0.149979 | 0.204356  |
| H | 3.508693  | 0.047711  | -0.616358 |
| H | 3.011148  | -0.185140 | 1.101036  |
| H | 2.965646  | 1.452546  | 0.353555  |

CCSD(T) Energy: -343.891645

TS connecting methylpyruvoylcarbene and dimethylcyclopropanone epoxide; CCSD(T)/cc-pVTZ//

CCSD/cc-pVDZ:

|   |           |           |           |
|---|-----------|-----------|-----------|
| O | -0.251701 | 2.066174  | 0.000000  |
| C | 0.000000  | 0.860185  | 0.000000  |
| C | 1.080369  | -0.029910 | 0.000000  |
| C | -0.912489 | -0.386351 | 0.000000  |
| O | -0.045972 | -1.304523 | 0.000000  |
| C | -2.377051 | -0.610475 | 0.000000  |
| H | -2.798054 | -0.102476 | 0.886210  |
| H | -2.798054 | -0.102476 | -0.886210 |
| H | -2.630281 | -1.681442 | 0.000000  |
| C | 2.522330  | -0.341586 | 0.000000  |
| H | 2.845518  | -0.897611 | 0.900594  |
| H | 2.845518  | -0.897611 | -0.900594 |
| H | 3.037778  | 0.637241  | 0.000000  |

CCSD(T) Energy: -343.889812

Dimethylcyclopropanone epoxide (17): CCSD(T)/cc-pVTZ//CCSD/cc-pVDZ:

|   |           |           |           |
|---|-----------|-----------|-----------|
| C | -0.279140 | 0.969121  | 1.806719  |
| C | -0.279140 | 0.969121  | -1.806719 |
| C | -0.279140 | -0.123389 | 0.787444  |
| C | -0.279140 | -0.123389 | -0.787444 |
| C | 0.750976  | -0.825088 | 0.000000  |
| O | -1.428088 | -0.436805 | 0.000000  |
| O | 1.913941  | -1.143980 | 0.000000  |
| H | -0.859770 | 1.833529  | 1.438904  |
| H | -0.859770 | 1.833529  | -1.438904 |
| H | -0.744228 | 0.613548  | 2.742949  |
| H | -0.744228 | 0.613548  | -2.742949 |
| H | 0.757334  | 1.276934  | 2.026361  |
| H | 0.757334  | 1.276934  | -2.026361 |

CCSD(T) Energy: -343.915479

CCSD Energy: -343.531417

CCSD Enthalpy: -343.424715

- 
- MOLPRO, version 2006.1, Werner, H.-J.; Knowles, P. J.; Lindh, R.; Manby, F. R.; Schütz, M.; Celani, P.; Korona, T.; Rauhut, G.; Amos, R. D.; Bernhardsson, A.; Berning, A.; Cooper, D. L.; Deegan, M. J. O.; Dobbyn, A. J.; Eckert, F.; Hampel, C.; Hetzer, G.; Lloyd, A. W.; McNicholas, S. J.; Meyer, W.; Mura, M. E.; Nicklass, A.; Palmieri, P.; Pitzer, R.; Schumann, U.; Stoll, H.; Stone, A. J.; Tarroni, R.; Thorsteinsson T., see <http://www.molpro.net>.
  - Gaussian 03* (Revision B.04); Frisch, M. J.; Trucks, G. W.; Schlegel, H. B.; Scuseria, G. E.; Robb, M. A.; Cheeseman, J. R.; Montgomery, J. A.; Vreven, Jr., T.; Kudin, K. N.; Burant, J. C.; Millam, J. M.; Iyengar, S. S.; Tomasi, J.; Barone, V.; Mennucci, B.; Cossi, M.; Scalmani, G.; Rega, N.; Petersson, G. A.; Nakatsuji, H.; Hada, M.; Ehara, M.; Toyota, K.; Fukuda, R.; Hasegawa, J.; Ishida, M.; Nakajima, T.; Honda, Y.; Kitao, O.; Nakai,

---

H.; Klene, M.; Li, X.; Knox, J. E.; Hratchian, H. P.; Cross, J. B.; Adamo, C.; Jaramillo, J.; Gomperts, R.; Stratmann, R. E.; Yazyev, O.; Austin, A. J.; Cammi, R.; Pomelli, C.; Ochterski, J. W.; Ayala, P. Y.; Morokuma, K.; Voth, G. A.; Salvador, P.; Dannenberg, J. J.; Zakrzewski, V. G.; Dapprich, S.; Daniels, A. D.; Strain, M. C.; Farkas, O.; Malick, D. K.; Rabuck, A. D.; Raghavachari, K.; Foresman, J. B.; Ortiz, J. V.; Cui, Q.; Baboul, A. G.; Clifford, S.; Cioslowski, J.; Stefanov, B. B.; Liu, G.; Liashenko, A.; Piskorz, P.; Komaromi, I.; Martin, R. L.; Fox, D. J.; Keith, T.; Al-Laham, M. A.; Peng, C. Y.; Nanayakkara, A.; Challacombe, M.; Gill, P. M. W.; Johnson, B.; Chen, W.; Wong, M. W.; Gonzalez, C.; Pople, J. A. Gaussian, Inc., Pittsburgh PA, 2003.
